# Supplementary material for: Decomposing the Tea Bag Index and finding slower organic matter loss rates at higher elevations and deeper soil horizons in a minerogenic salt marsh
Source: Copernicus journal article supplement (doi:10.5194/egusphere-2024-1328), 2024-06-06
Supplement: Supplementary file 1 [file egusphere-2024-1328-supplement.pdf]

## Supplementary Information

Table S1. Plot distance from creekbank edge (m), elevation (NAVD 88, m), and calculated relative elevation ( $Z^*$ ) (eq. 1) relative to the nearest NOAA tide gauge (Ft. Pulaski, GA 32.035N, 80.903W).

| <b>Plot Number</b> | <b>NAVD88 elevation (m)</b> | <b>Relative Elevation (<math>Z^*</math>)</b> | <b>Distance between Tea Bag Plots and Tidal Creek Bank Edge (m)</b> |
|--------------------|-----------------------------|----------------------------------------------|---------------------------------------------------------------------|
| 1                  | 0.759                       | 0.739                                        | 20.36                                                               |
| 2                  | 0.817                       | 0.791                                        | 15.9                                                                |
| 3                  | 0.817                       | 0.791                                        | 14.73                                                               |
| 4                  | 0.92                        | 0.882                                        | 13.27                                                               |
| 5                  | 0.957                       | 0.915                                        | 12.17                                                               |
| 6                  | 1.036                       | 0.986                                        | 12.45                                                               |
| 7                  | 1.098                       | 1.041                                        | 13.98                                                               |
| 8                  | 1.127                       | 1.067                                        | 12.62                                                               |
| 9                  | 0.796                       | 0.772                                        | 16.34                                                               |
| 10                 | 0.612                       | 0.608                                        | 9.83                                                                |
| 11                 | 0.623                       | 0.618                                        | 7.37                                                                |
| 12                 | 0.875                       | 0.842                                        | 1.36                                                                |
| 13                 | 0.997                       | 0.951                                        | 4.1                                                                 |
| 14                 | 1.051                       | 0.999                                        | 4.17                                                                |
| 15                 | 1.086                       | 1.030                                        | 6.33                                                                |
| 16                 | 1.042                       | 0.991                                        | 6.09                                                                |
| 17                 | 0.796                       | 0.772                                        | 16.21                                                               |
| 19                 | 0.545                       | 0.549                                        | 6.61                                                                |
| 20                 | 0.638                       | 0.631                                        | 3.19                                                                |
| 21                 | 0.62                        | 0.615                                        | 0.64                                                                |
| 22                 | 0.666                       | 0.656                                        | 1.64                                                                |
| 23                 | 0.689                       | 0.677                                        | 0.74                                                                |
| 24                 | 0.657                       | 0.648                                        | 0.49                                                                |

Table S2. Goodness of fit values ( $r^2$ ) for the average rate of decomposition of fresh roots ( $\pm$  SE) from levee and plain salt marsh sites

| Salinity (psu) | Salt Marsh Site | Decomposition Rate ( $k\ d^{-1}$ ) | $r^2$ | p-value |
|----------------|-----------------|------------------------------------|-------|---------|
| 16             | Plain           | 0.0021                             | 0.95  | 0.0001  |
|                | Levee           | 0.0015                             | 0.85  | 0.0001  |
| 27             | Plain           | 0.0019                             | 0.91  | 0.0001  |
|                | Levee           | 0.0016                             | 0.85  | 0.0001  |

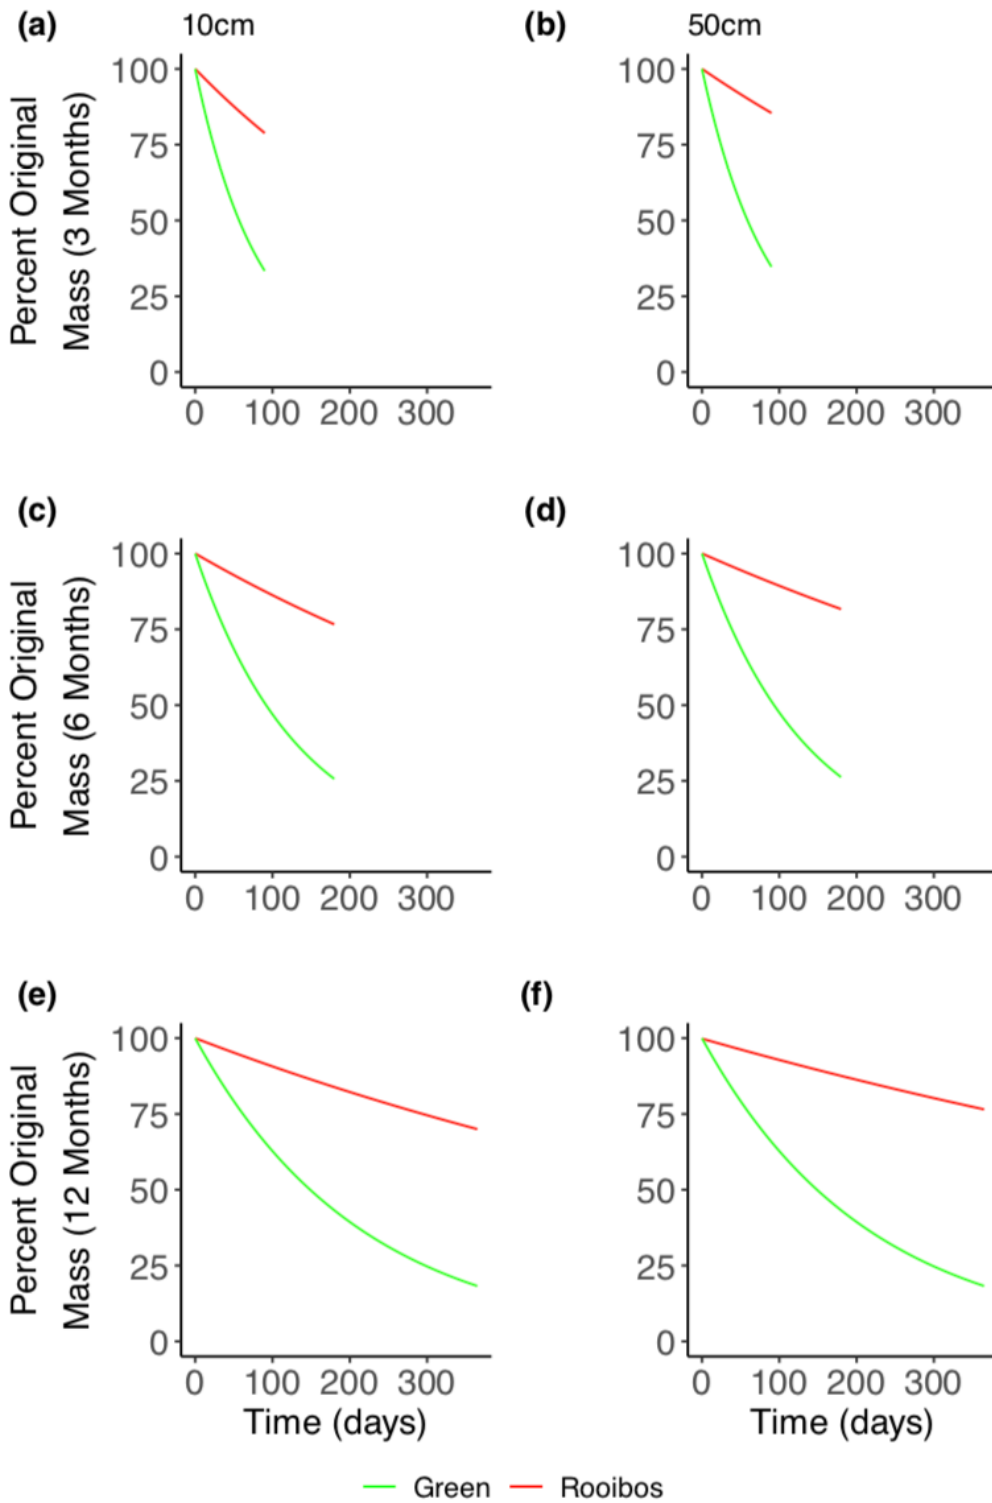

Figure S1. Average empirical decay rates of tea bags at 10 cm (left) and 50 cm (right) changed with tea bag type (rooibos, red; green, green) over time in days during 3- (top), 6- (middle), and 12- months (bottom).

Table S3) Values, and studies listed for Fig. 4. We report NA for studies without SE estimates.

| <u>Decay</u> | <u>Stabilization</u> | <u>Latitude</u> | <u>Time</u> | <u>Location</u>                 | <u>Labels</u>         | <u>Study</u>                |
|--------------|----------------------|-----------------|-------------|---------------------------------|-----------------------|-----------------------------|
| 12           | 0.34                 | 31.5            | 3           | Sapelo Island                   | GA, USA               |                             |
| 4.1          | 0.22                 | 31.5            | 6           | Sapelo Island                   | GA, USA               |                             |
| 2.6          | 0.26                 | 31.5            | 12          | Sapelo Island                   | GA, USA               |                             |
| 7            | 0.236                | -37.7           | 3           | Mar Chiquita                    | B, Argentina          | Meuller et al 2018          |
| 13.5         | -0.033               | 37.6            | 3           | Wachapreague                    | VA, USA               | Meuller et al 2018          |
| 14.5         | 0.0345               | 38.2            | 3           | Rush Ranch                      | CA, USA               | Meuller et al 2018          |
| 14           | 0.0585               | 38.2            | 3           | Coon Island                     | CA, USA               | Meuller et al 2018          |
| 24.5         | 0.1825               | 53.4            | 3           | Noord-Friesland<br>Buitendijks  | FR, Netherlands       | Meuller et al 2018          |
| 0            | 0.504                | 48.1            | 3           | Rimouski                        | QC, Canada            | Meuller et al 2018          |
| 6            | 0.4215               | 53.8            | 3           | Spiekeroog                      | NI, Germany           | Meuller et al 2018          |
| 11           | -0.078               | 42.7            | 3           | TIDE project                    | MA, USA               | Meuller et al 2018          |
| 12           | -0.035               | 42.7            | 3           | Laws Point                      | MA, USA               | Meuller et al 2018          |
| 16.5         | -0.085               | 38.7            | 3           | Patuxent River                  | MD, USA               | Meuller et al 2018          |
| 8            | 0.219                | 40.8            | 3           | Alfacs                          | TGN, Catalonia, Spain | Meuller et al 2018          |
| 8            | -0.003               | 53.5            | 3           | Schiermonnikoog                 | FR, Netherlands       | Meuller et al 2018          |
| 5            | 0.258                | 45.5            | 3           | Venice Lagoon<br>(Meuller)      | VEN, Italy            | Meuller et al 2018          |
| 11           | 0.098                | 38.1            | 3           | China Camp                      | CA, USA               | Meuller et al 2018          |
| 15.5         | -0.0675              | 53.4            | 3           | Ameland                         | FR, Netherlands       | Meuller et al 2018          |
| 19.5         | 0.0535               | 54.6            | 3           | Sönke-Nissen-Koog               | SH, Germany           | Meuller et al 2018          |
| 27.5         | 0.1505               | 54              | 3           | Dieksanderkoog                  | SH, Germany           | Meuller et al 2018          |
| -1           | 0.347                | 40.8            | 3           | Garxal                          | TGN, Catalonia, Spain | Meuller et al 2018          |
| 11           | 0.1655               | 45.1            | 3           | Dipper Harbor                   | NB, Canada            | Meuller et al 2018          |
| 17           | 0.161                | 54.6            | 3           | Mechelinskie Laki               | PM, Poland            | Meuller et al 2018          |
| 17.5         | -0.1055              | 38.9            | 3           | Rhode River                     | CA, USA               | Meuller et al 2018          |
| 4            | 0.242                | 43.8            | 3           | Long Marsh, north<br>of inlet   | ME, USA               | Meuller et al 2018          |
| 7            | 0.189                | 43.8            | 3           | Long Marsh, south<br>of inlet   | ME, USA               | Meuller et al 2018          |
| 13           | -0.028               | 31.5            | 3           | Dongtan                         | ZJ, China             | Meuller et al 2018          |
| 31           | 0.337                | 40.8            | 3           | Vilacoto                        | TGN, Catalonia, Spain | Meuller et al 2018          |
| 7            | 0.195                | 43.8            | 3           | Long Marsh, south<br>of Narrows | ME, USA               | Meuller et al 2018          |
| 8            | 0.4                  | 54.6            | 12          | Hamburger Hallig                | SH, Germany           | Tang et al 2023             |
| 12           | 0.015                | 45.3            | 3           | Venice Lagoon<br>(Puppini)      | VEN, Italy            | Puppini et al 2023          |
| 11           | 0.09                 | 34.2            | 3           | Wrightsville Beach              | NC, USA               | Yousefi Lalimi et al., 2018 |
| 8            | 0.18                 | 56.0            | 3           | Belhaven Bay                    | ELN, Scotland         | Marley et al. 2019          |
| 3            | 0.15                 | 56.0            | 12          | Belhaven Bay                    | ELN, Scotland         | Marley et al. 2019          |
| 11           | 0.18                 | 25.7            | 3           | Northeast Qatar                 | KH, Qatar             | Alsafran et al. 2017        |
| 8.6          | 0.16                 | 41.6            | 3           | Cape Cod                        | MA, USA               | Sanderman and Eagle, unpb   |
